# Supplementary material for: iGUIDE: an improved pipeline for analyzing CRISPR cleavage specificity
Source: PubMed Central journal article supplement (PMC6337799; doi:10.1186/s13059-019-1625-3), 2019-01-17

**Figure S2**

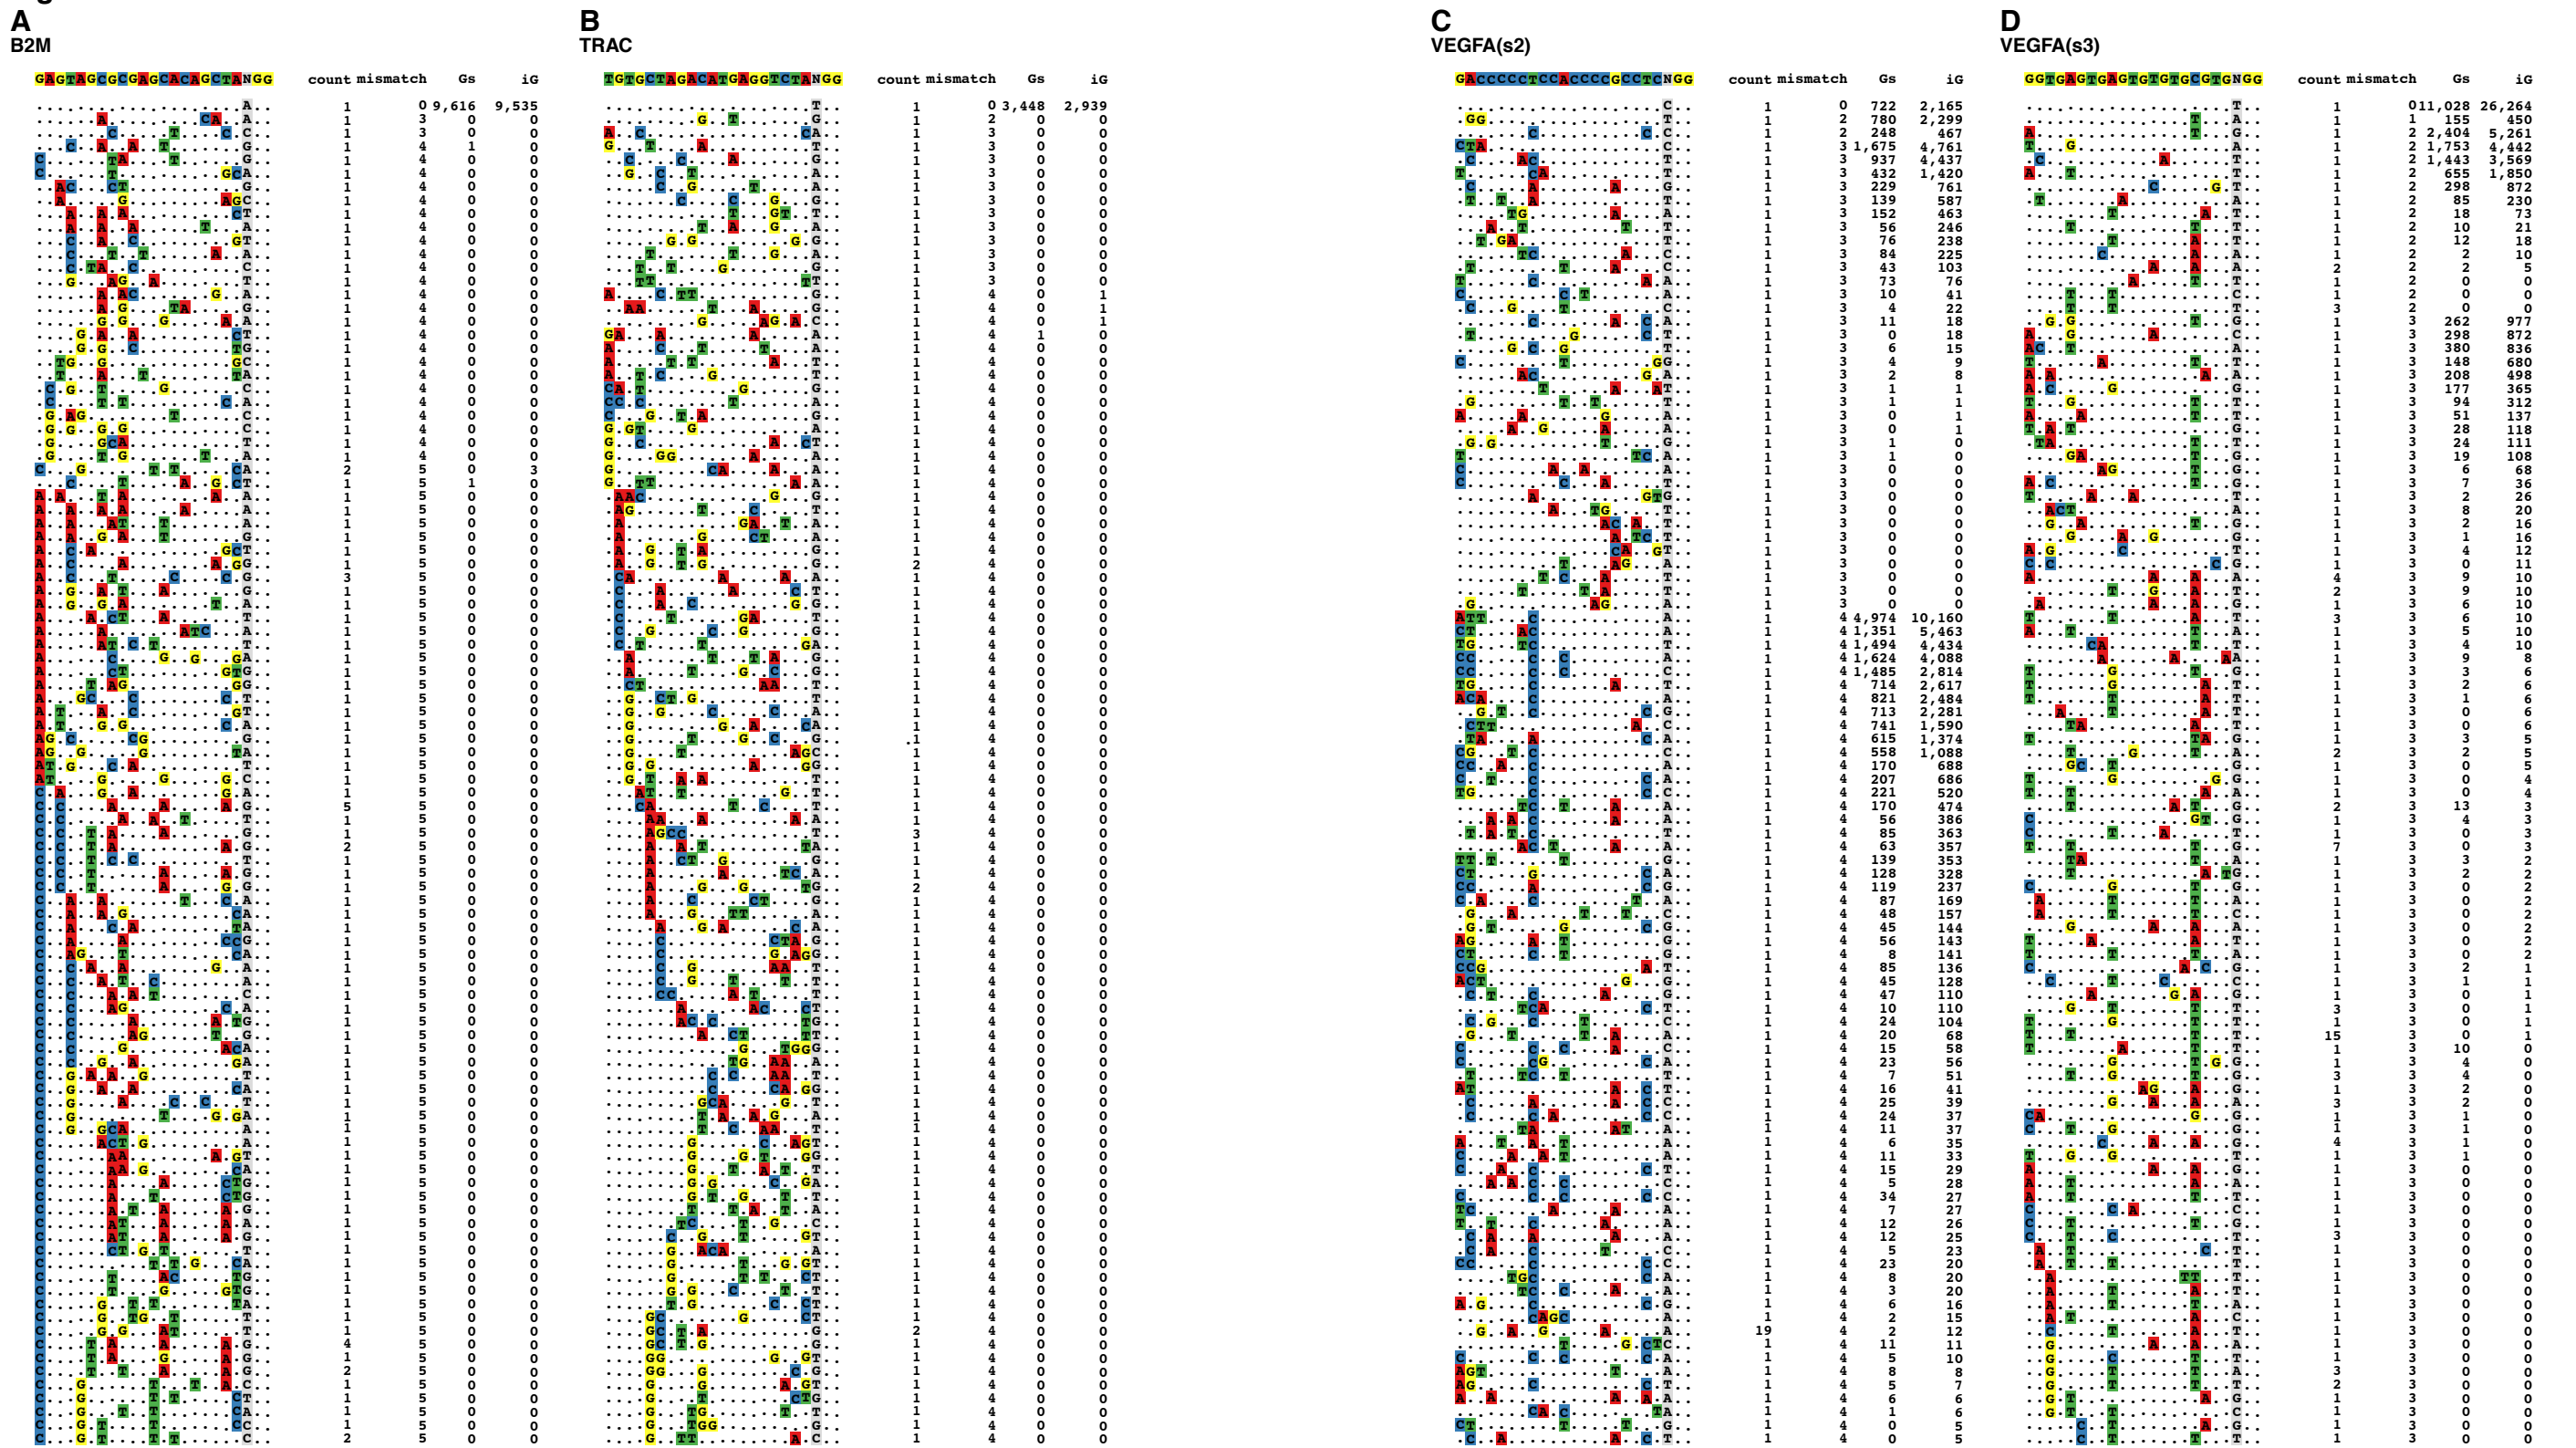

Supplement: 13059_2019_1625_MOESM7_ESM.pdf [file 13059_2019_1625_MOESM7_ESM.pdf]
